# Supplementary material for: MDC1 Interacts with TOPBP1 to Maintain Chromosomal Stability during Mitosis
Source: PubMed Central journal article supplement — Mol Cell. 2019 May 2;74(3):571–583.e8. doi: 10.1016/j.molcel.2019.02.014 (PMC6509287; doi:10.1016/j.molcel.2019.02.014), 2019-05-02
Supplement: mmc1.pdf [file mmc1.pdf]

**Molecular Cell, Volume 74**

## **Supplemental Information**

### **MDC1 Interacts with TOPBP1 to Maintain**

### **Chromosomal Stability during Mitosis**

**Pia-Amata Leimbacher, Samuel E. Jones, Ann-Marie K. Shorrocks, Mara de Marco Zompit, Matthew Day, Jordy Blaauwendraad, Diana Bundschuh, Sarah Bonham, Roman Fischer, Daniel Fink, Benedikt M. Kessler, Antony W. Oliver, Laurence H. Pearl, Andrew N. Blackford, and Manuel Stucki**

**A**

|        |   |   |   |   |          |          |          |   |   |   |   |
|--------|---|---|---|---|----------|----------|----------|---|---|---|---|
| hsMDC1 | L | L | A | E | <b>D</b> | <b>S</b> | E        | E | E | V |   |
| mmMDC1 | V | L | L | A | A        | <b>D</b> | <b>S</b> | E | E | E | G |
| xlMDC1 | S | V | L | A | M        | <b>D</b> | <b>S</b> | G | D | E | E |
| drMDC1 | I | T | L | V | P        | <b>E</b> | <b>S</b> | D | S | D | G |

  

|        |   |   |   |   |   |          |          |   |   |   |   |
|--------|---|---|---|---|---|----------|----------|---|---|---|---|
| hsRAD9 | P | V | L | A | E | <b>D</b> | <b>S</b> | E | G | E | G |
| mmRAD9 | P | V | L | A | E | <b>D</b> | <b>S</b> | D | G | E | G |
| xlRAD9 | E | L | L | A | E | <b>D</b> | <b>S</b> | D | G | E | E |
| drRAD9 | E | V | L | A | S | <b>D</b> | <b>S</b> | E | D | E | N |

**B**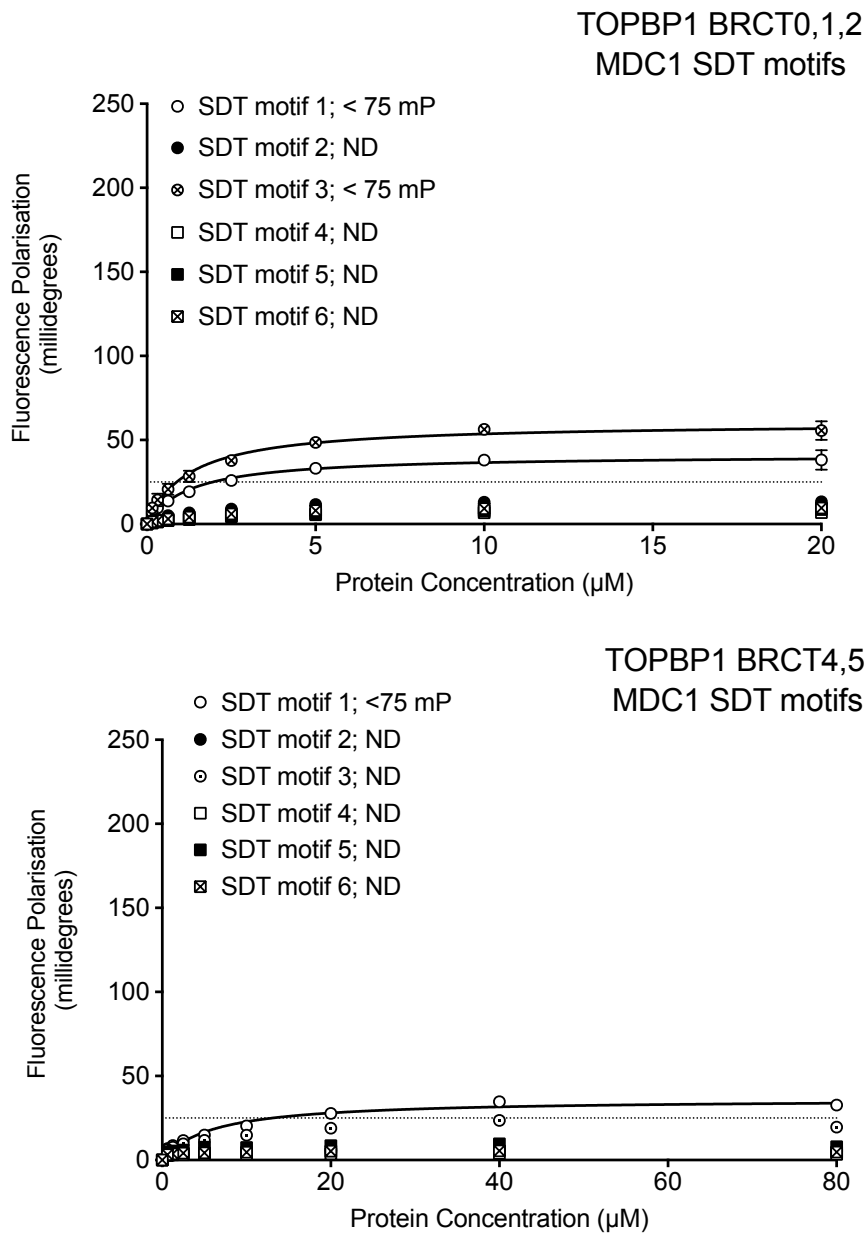**Figure S1** (related to Figure 2).

(A) Sequence alignment showing the evolutionary conservation and similarity of the TOPBP1 BRCT1-binding motifs in MDC1 (centred around S168 in humans) and RAD9 (centred around S387 in humans). hs = Homo sapiens, mm = Mus musculus, xl = Xenopus laevis, dr = Danio rerio. Key phosphorylated serines are highlighted in bold.

(B) Fluorescence polarization with indicated recombinant TOPBP1 BRCT domains and the 6 SDT motifs found in human MDC1 synthesized as phosphopeptides. ND = not determined.

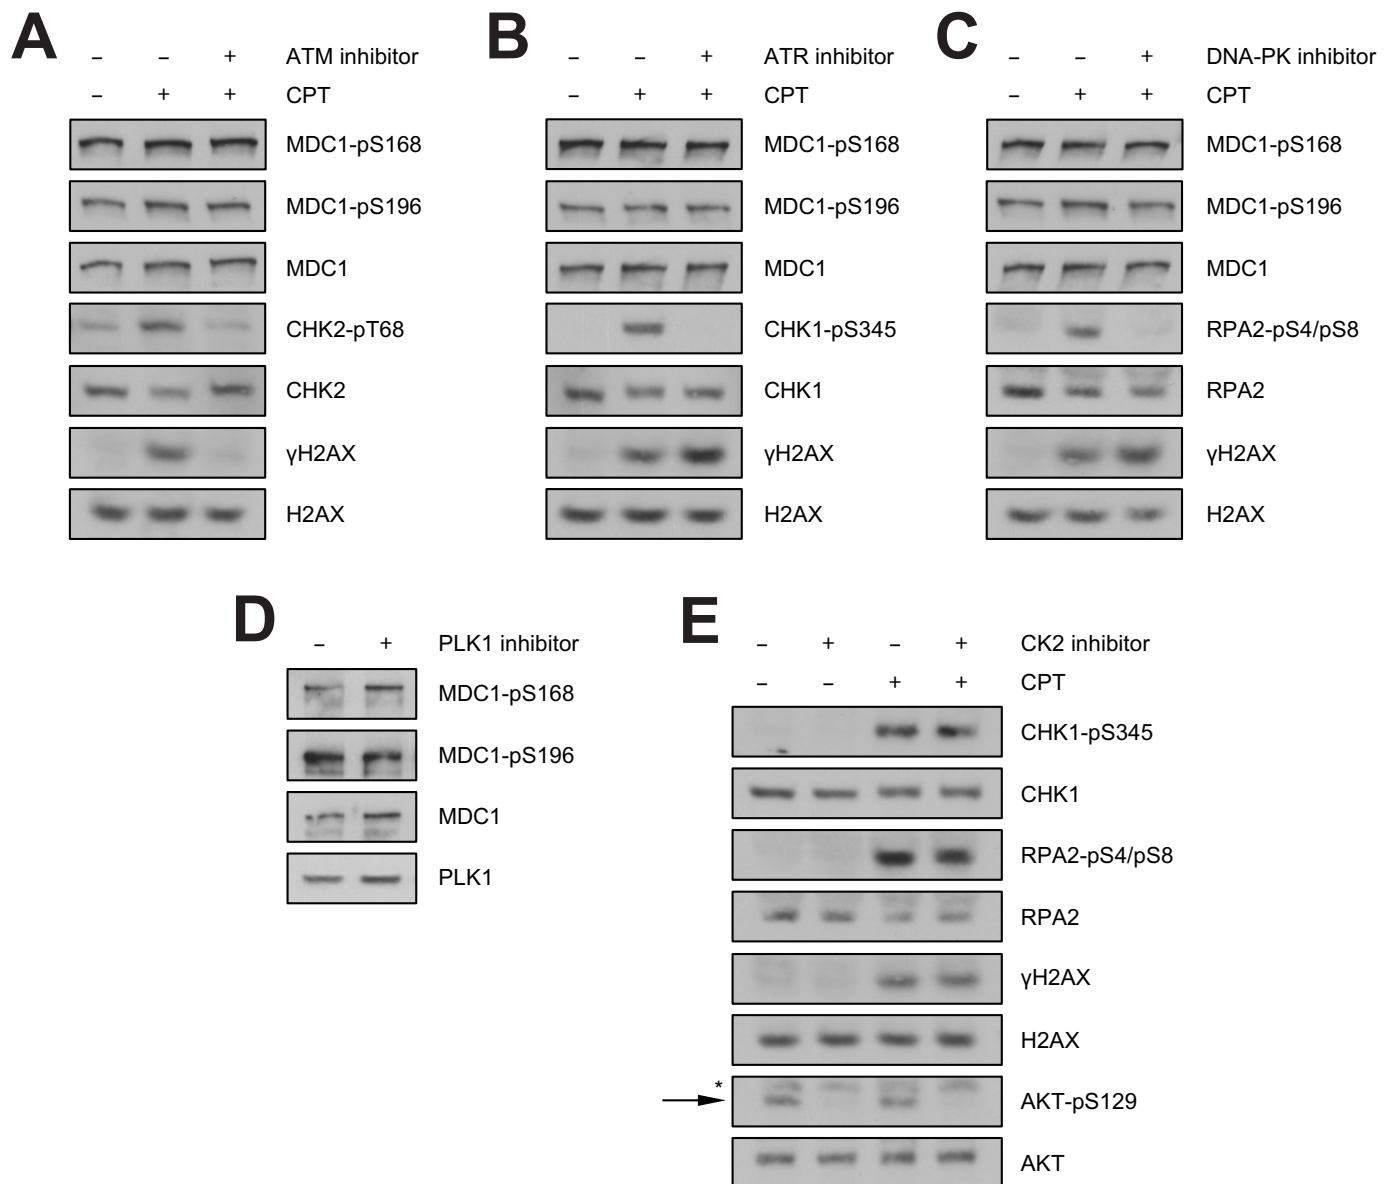

**Figure S2** (related to Figure 3).

(A) U2OS cells treated as indicated with 10  $\mu$ M ATM inhibitor AZD0156 and/or 1  $\mu$ M camptothecin (CPT) were harvested for western blotting with the indicated antibodies. CHK2-pT68 and  $\gamma$ H2AX are positive controls for AZD0156 activity as they are ATM-dependent after CPT treatment.

(B) U2OS cells treated as indicated with 1  $\mu$ M ATR inhibitor AZD6738 and/or 1  $\mu$ M CPT were harvested for western blotting with the indicated antibodies. CHK1-pS345 is a positive control for AZD6738 activity as its levels are ATR-dependent.

(C) U2OS cells treated as indicated with 3  $\mu$ M DNA-PK inhibitor NU7441 and/or 1  $\mu$ M CPT were harvested for western blotting with the indicated antibodies. RPA2-pS4/pS8 is a positive control for NU7441 activity as it is DNA-PK-dependent after CPT treatment.

(D) U2OS cells treated as indicated with 100 nM PLK1 inhibitor BI 2536 or DMSO vehicle control were harvested for western blotting with the indicated antibodies.

(E) U2OS cells treated as indicated with 10  $\mu$ M CK2 inhibitor CX-4945 and/or 1  $\mu$ M camptothecin (CPT) were harvested for western blotting with the indicated antibodies. CHK1, RPA and H2AX phosphorylation in response to CPT are dependent on ATR, DNA-PK and ATM, respectively; AKT-pS129 is a positive control for CX-4945 activity as AKT is a known CK2 substrate.

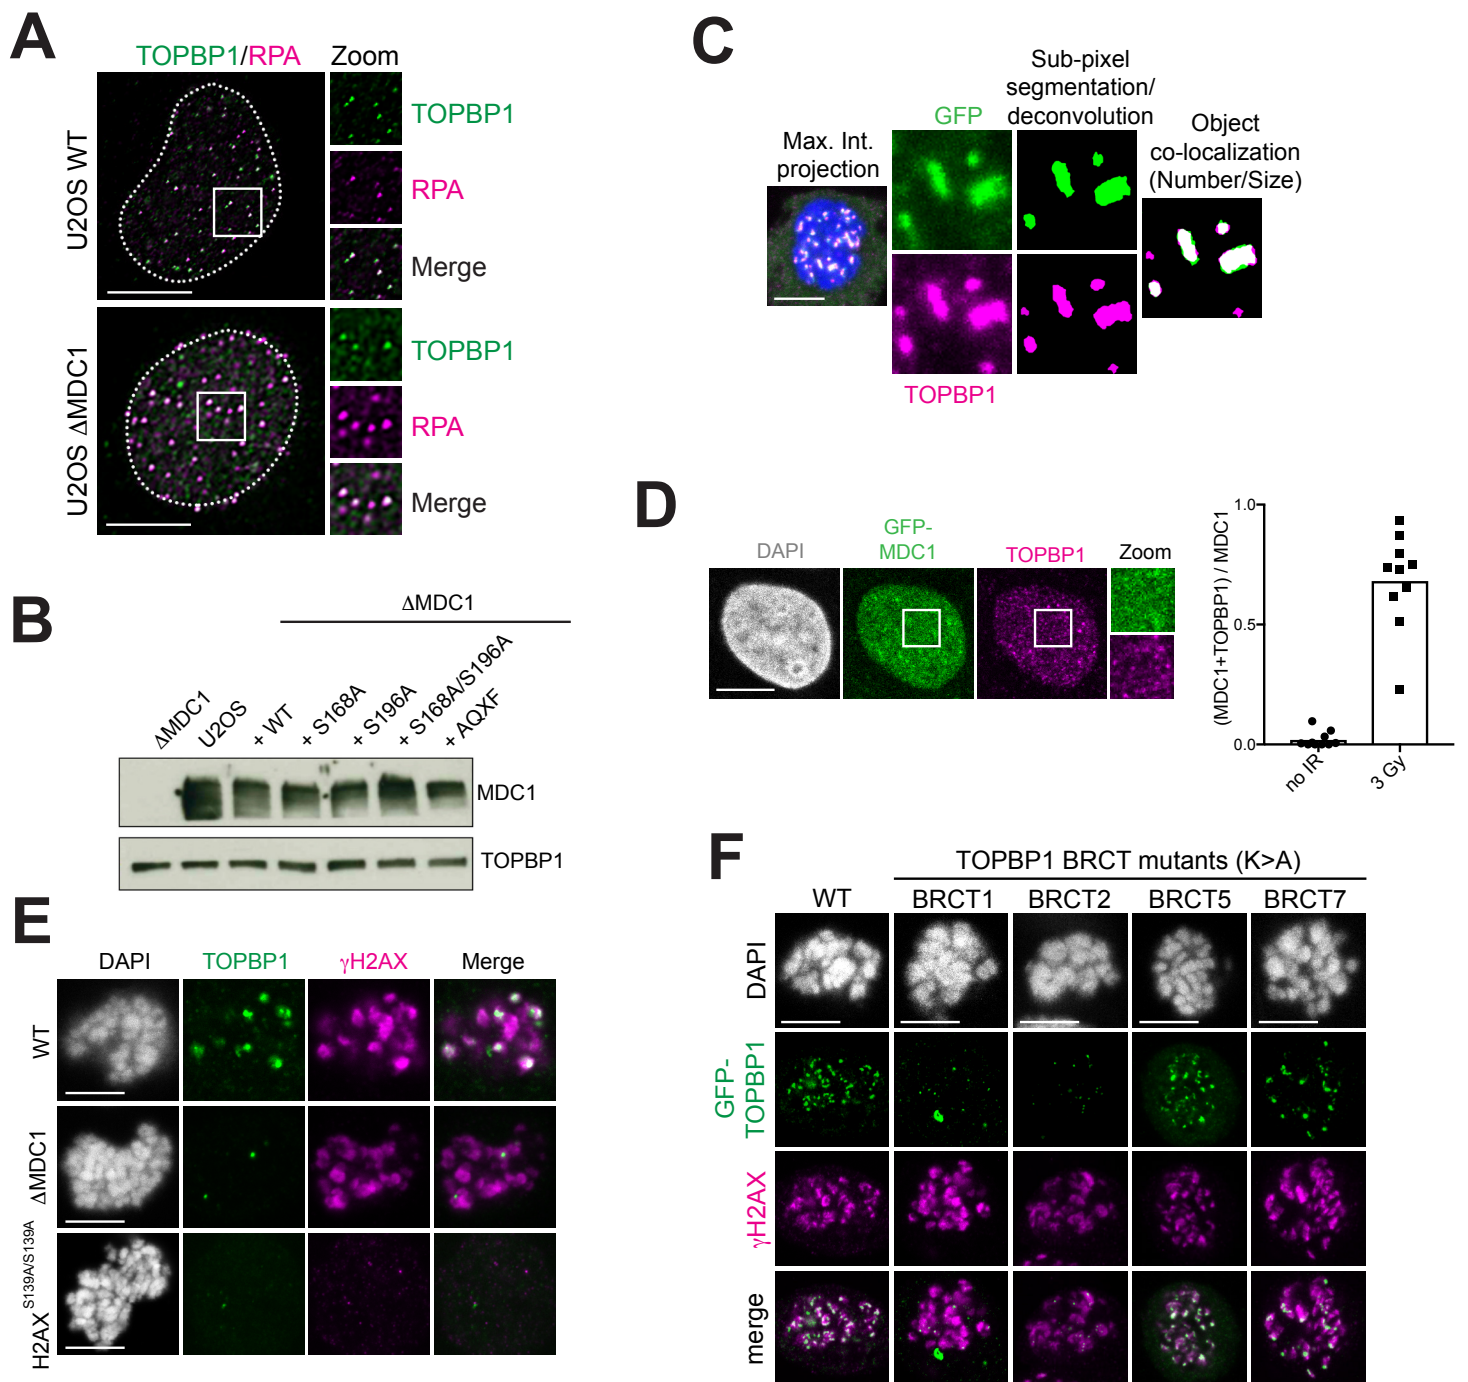

**Figure S3** (related to Figure 4 and 5).

(A) Immunofluorescence experiment of irradiated (3 Gy) WT U2OS cells and  $\Delta$ MDC1 cells. Cells were stained with TOPBP1 and RPA2 antibodies 3 hr after IR and images were deconvoluted for better assessment of protein co-localization.

(B) Western blot of extracts derived from  $\Delta$ MDC1 cell line stably transfected with GFP-tagged MDC1 WT and mutants.

(C) Sub-pixel segmentation/deconvolution by SQUASSH. See Star Methods for details.

(D) Left: Confocal microscopy of untreated GFP-MDC1-WT expressing U2OS cells, stained with TOPBP1 antibodies. Right: SQUASSH analysis of untreated and IR treated GFP-MDC1 expressing U2OS cells. Each data point represents one cell ( $n=10$ ), bars represent the mean.

(E) Confocal microscopy of RPE-1 WT,  $\Delta$ MDC1 and H2AX<sup>S139A/S139A</sup> cells, arrested in mitosis by nocodazole, treated with 0.5 Gy of IR, 1 hr after release from the nocodazole block (100 ng/ml).

(F) Confocal microscopy of 293T cells transfected with GFP-TOPBP1 WT and BRCT mutants BRCT1 (K155A), BRCT2 (K250A), BRCT5 (K704A) or BRCT7 (K1317A), arrested with 100 ng/ml nocodazole, 1 hr after treatment with 0.5 Gy of IR.

All scale bars represent 10  $\mu$ m.

**A**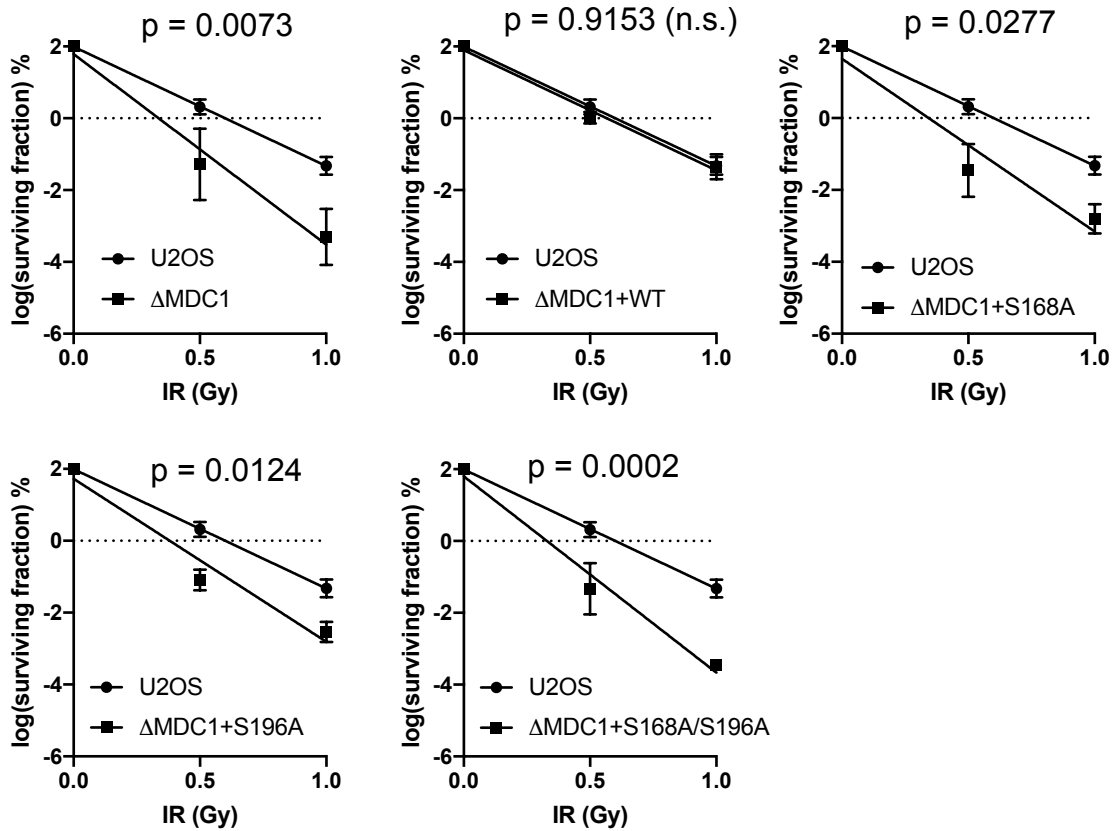**B**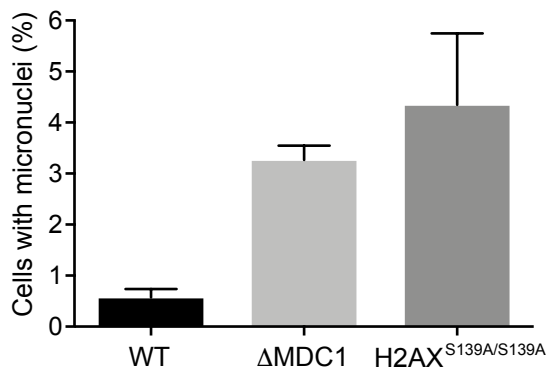**Figure S4** (related to Figure 6)

(A) Statistical evaluation of clonogenic survival analysis of U2OS cells,  $\Delta$ MDC1 cells and MDC1 complemented cell lines by linear regression. Each engineered cell line was compared to the parental U2OS cell line. Note that due to multiple comparisons,  $\alpha=0.05$  should be interpreted as familywise error rate.

(B) Quantification of micronuclei formation in untreated RPE-1 cell lines (bars represent mean  $\pm$  SD,  $n=3$ ; at least 1000 cells analyzed per condition).

**A**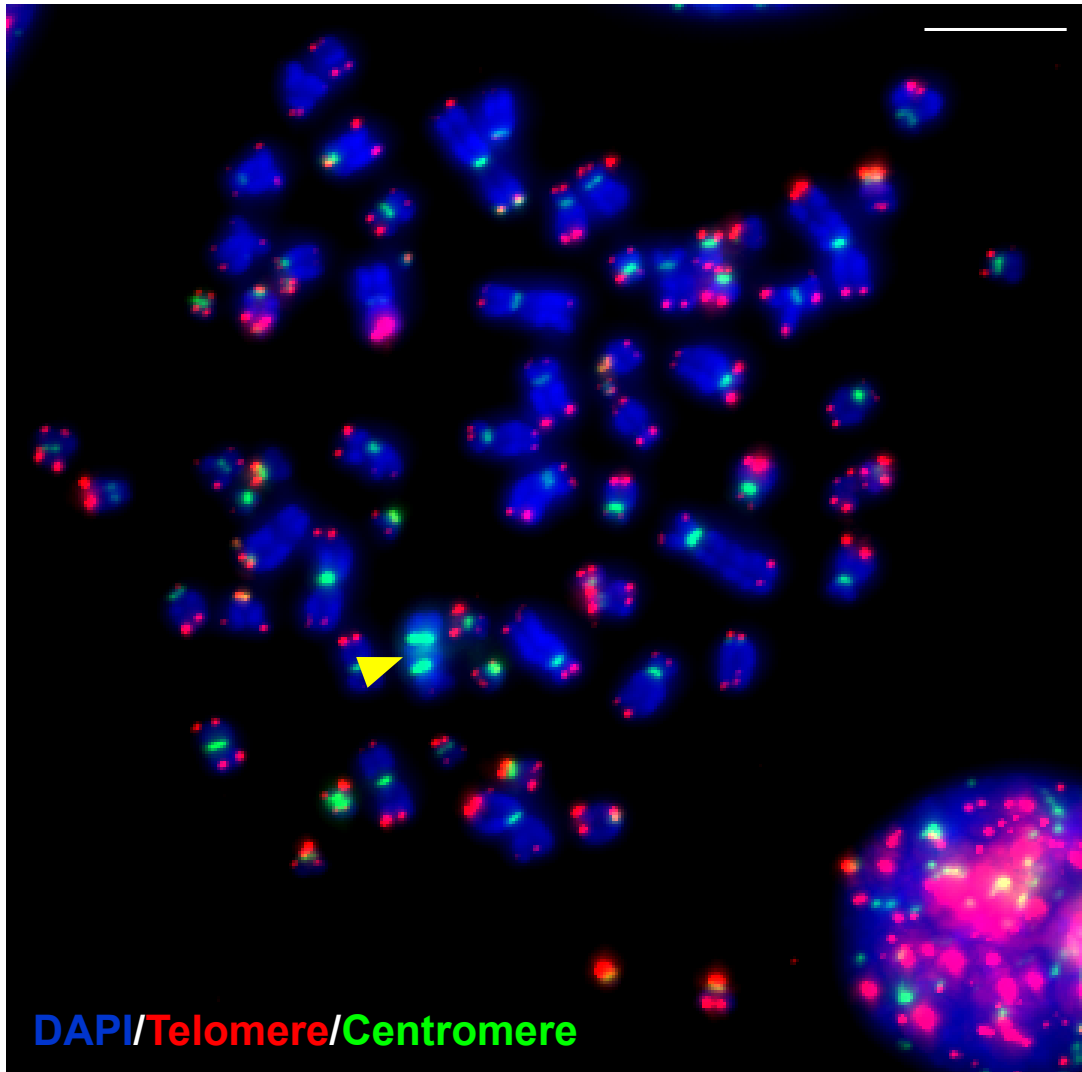**B**

|               | U2OS  | $\Delta$ MDC1 |       |        |
|---------------|-------|---------------|-------|--------|
|               |       | -             | +WT   | +S196A |
| Experiment #1 | 44.3% | 80.5%         | 49.2% | 91.3%  |
| Experiment #2 | 48.7% | 76.5%         | 41.5% | 88.0%  |

Metaphases with >0 dicentric chromosomes

**Figure S5** (related to Figure 7)

(A) Example of metaphase spread derived from U2OS,  $\Delta$ MDC1 cells and  $\Delta$ MDC1 cells stably transfected with TOPBP1 binding mutants, hybridized with a telomere Cy3-labeled PNA probe and centromere Cy5-labeled PNA probe. A dicentric chromosome is highlighted by an arrowhead.

(B) Quantification of the frequency of dicentric chromosomes in metaphase spreads of U2OS cells,  $\Delta$ MDC1 cells and  $\Delta$ MDC1 cells stably transfected with WT MDC1 and the S196A TOPBP1 binding mutant (two independent experiments).

Scale bar represents 10  $\mu$ m.

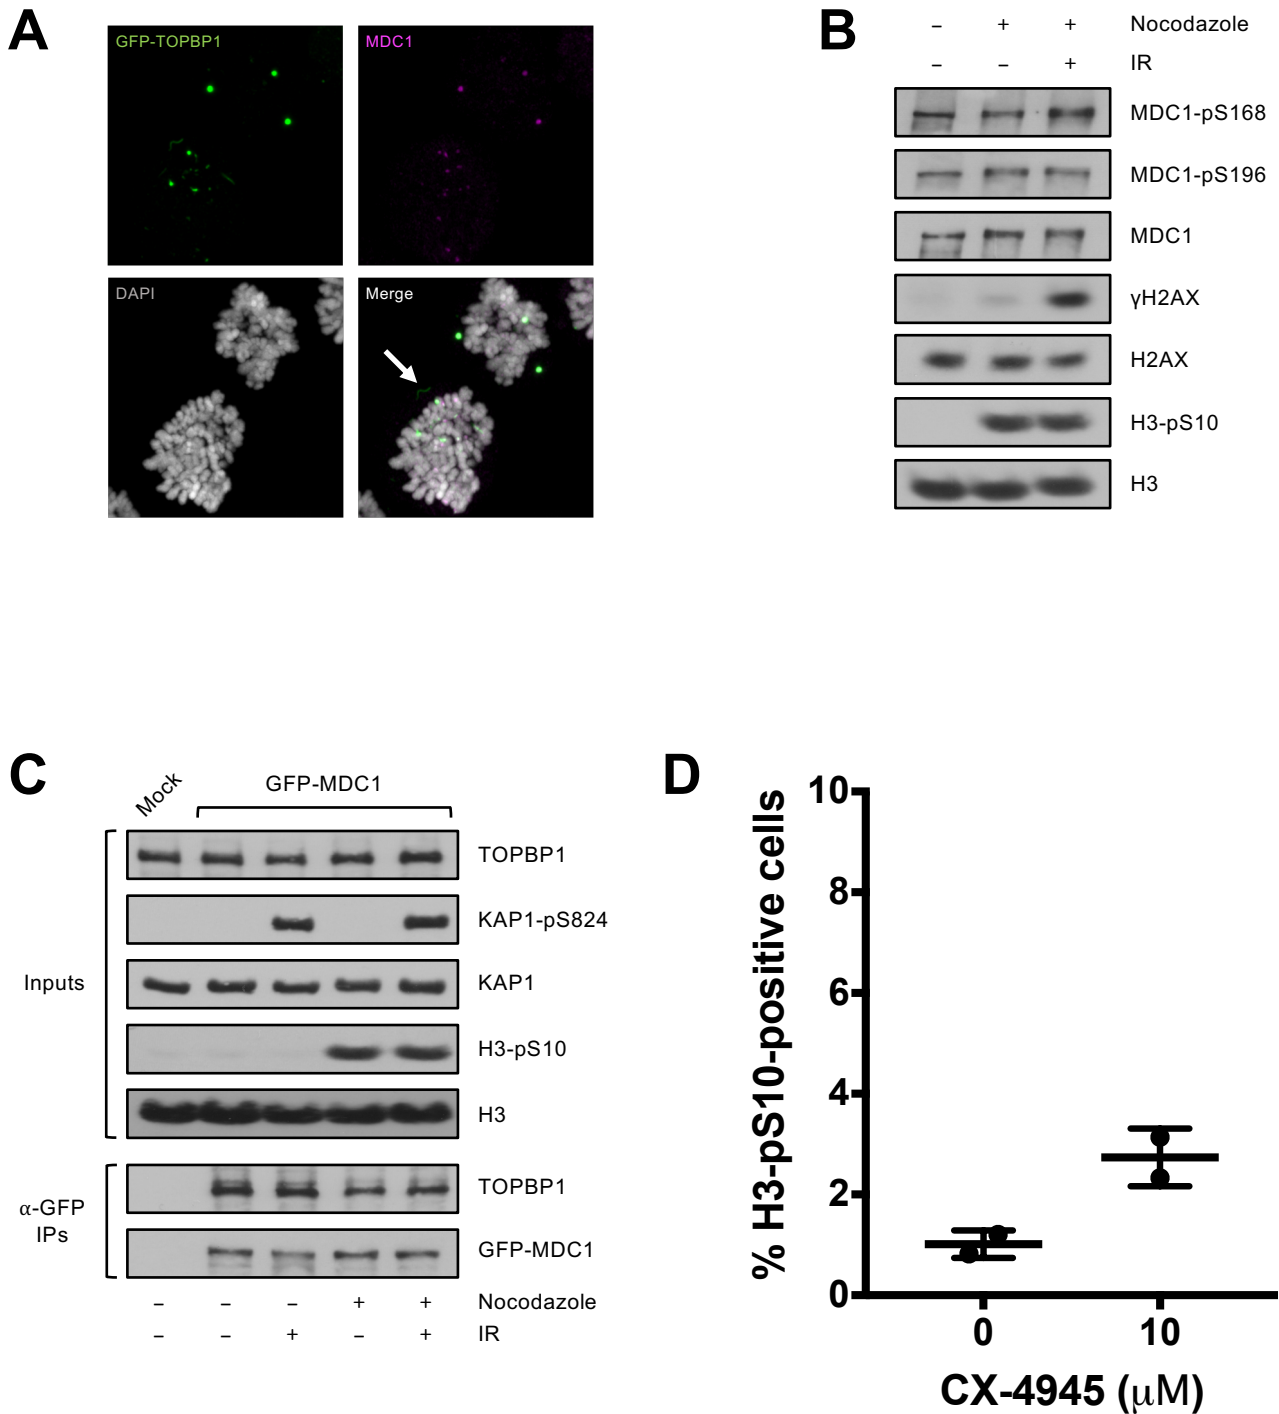

**Figure S6** (related to Figure 7 and Discussion).

(A) Maximum intensity projections of Airyscan images of unirradiated U2OS cells expressing GFP-TOPBP1. Arrow indicates example of a TOPBP1 filament that does not colocalize with condensed chromatin or MDC1.

(B) Western blot of lysates from U2OS cells treated with 40 ng/ml nocodazole and/or 10 Gy IR as indicated.

(C) GFP-pulldowns from 293FT cells either mock-transfected or transfected with GFP-MDC1 plasmid, and treated with 40 ng/ml nocodazole and/or 10 Gy IR as indicated.

(D) Graph of flow cytometry analyses demonstrating the effect of the CK2 inhibitor CX-4945 on the mitotic index of U2OS cells.



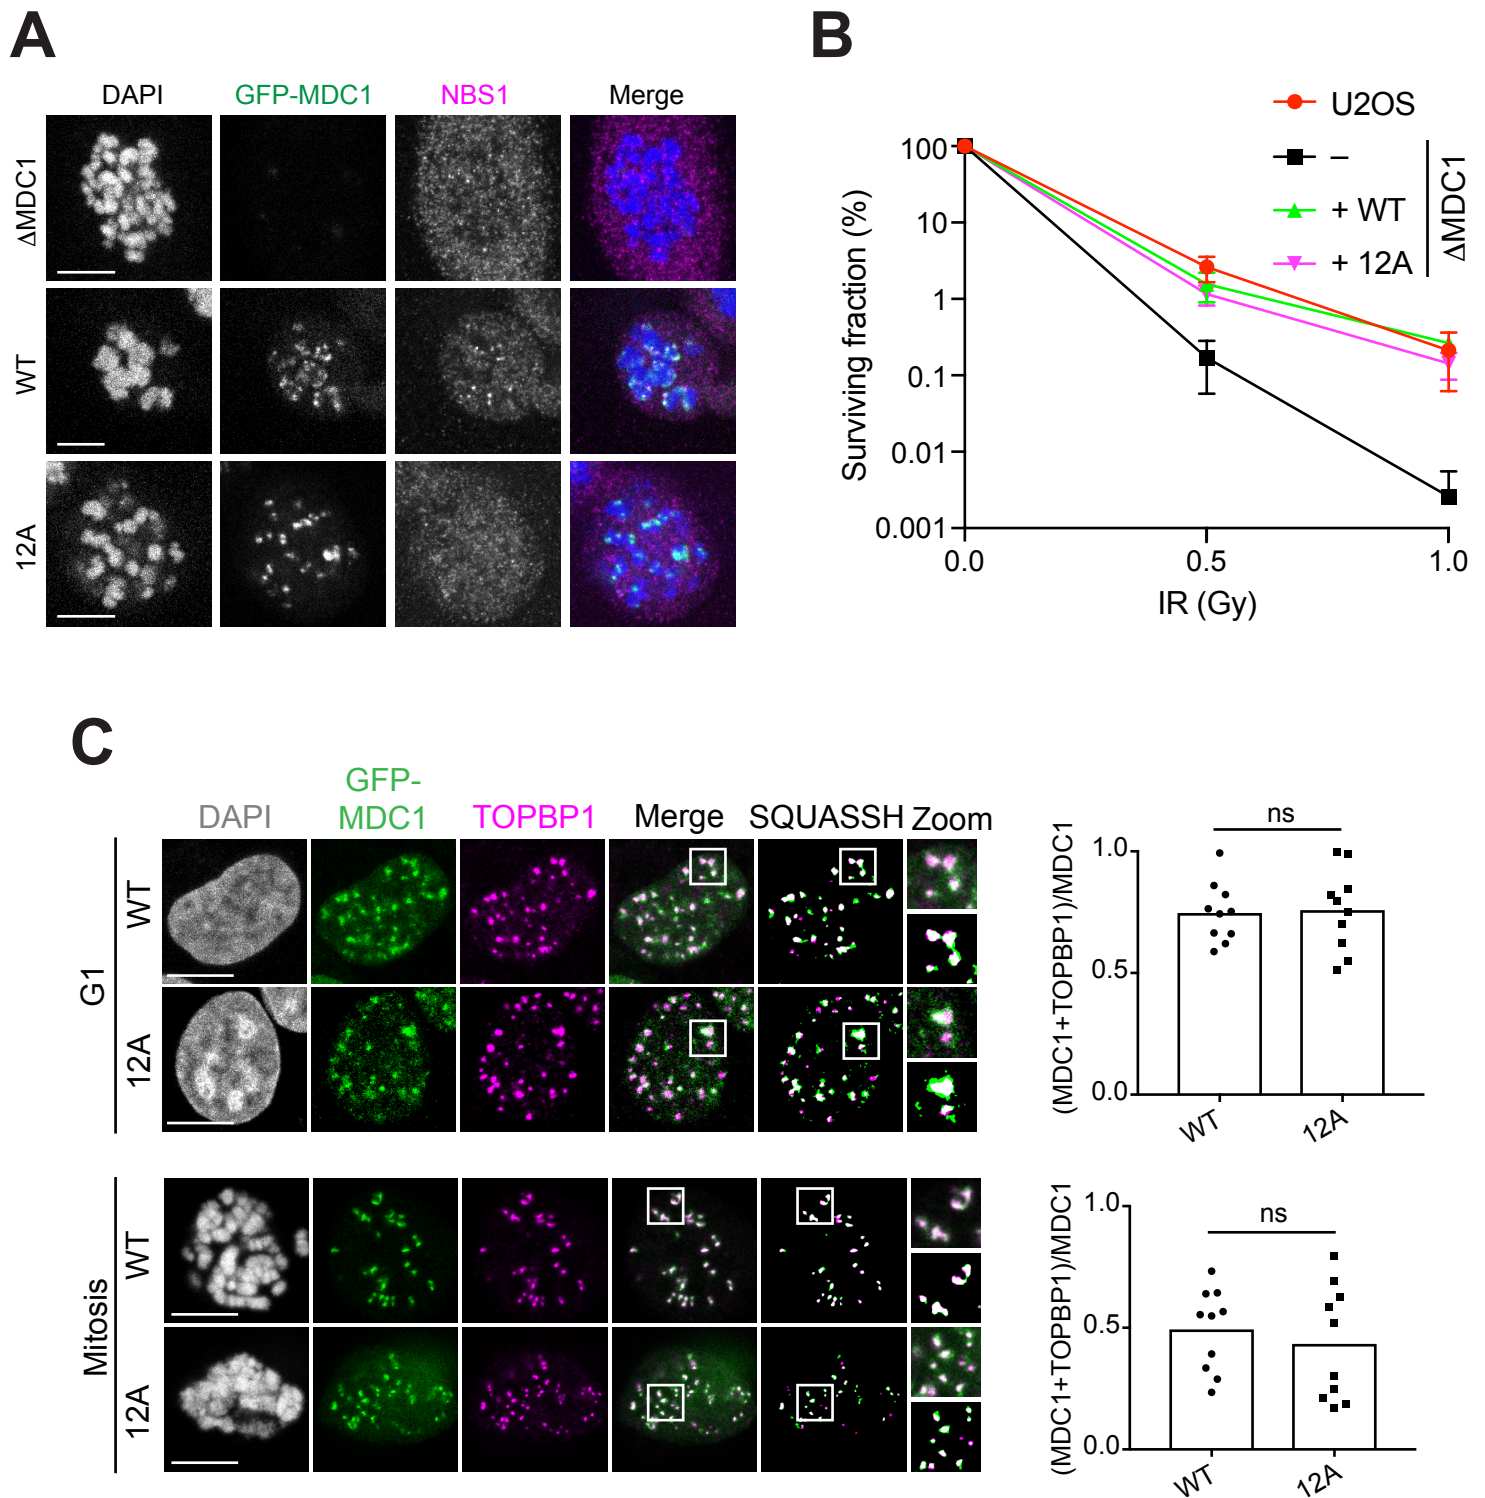

**Figure S7** (related to Discussion).

(A) Confocal microscopy of  $\Delta$ MDC1 cells and  $\Delta$ MDC1 cells stably transfected with WT MDC1 and 12A mutant, arrested with 100 ng/ml nocodazole, 1 hr after treatment with 0.5 Gy of IR.

(B) Clonogenic survival assay of mitotic U2OS,  $\Delta$ MDC1 and  $\Delta$ MDC1 cells stably transfected with GFP-MDC1 WT and 12A mutant (mean of 3 independent experiments, error bars:  $\pm$  SD).

(C) Confocal microscopy of irradiated  $\Delta$ MDC1 U2OS cells expressing GFP-tagged MDC1 WT and 12A mutant. Upper panel: interphase cells, 3 hr after 3 Gy; lower panel: cells arrested in mitosis by 100 ng/ml nocodazole, 1 hr after 0.5 Gy. Quantification of GFP-MDC1 and TOPBP1 co-localization by SQUASSH object number co-localization (bars represent mean;  $n=10$ , unpaired t-test,  $\alpha=0.05$ ).

Scale bars represent 10  $\mu$ m.



**Table S1** (related to Figure 1)  
Raw LC-MS/MS data

| Protein IDs         | Protein names                                           | Gene names | Fasta headers | LFQ intensity, median centred |                   |                    |                    | log pMDC1/MDC1, replicate 1 | log pMDC1/MDC1, replicate 2 | # of unique peptides |
|---------------------|---------------------------------------------------------|------------|---------------|-------------------------------|-------------------|--------------------|--------------------|-----------------------------|-----------------------------|----------------------|
|                     |                                                         |            |               | MDC1, replicate 1             | MDC1, replicate 2 | pMDC1, replicate 1 | pMDC1, replicate 2 |                             |                             |                      |
| Q13083;Q13085-4;Q1  | Acetyl-CoA carboxylase 1;Biotin carboxylase             | ACACA      | sp Q13085     | 1357.8                        | 350.8             | 299.3              | 1045.5             | -2.2                        | 1.6                         | 88                   |
| Q92547;H0Y817       | DNA topoisomerase 2-binding protein 1                   | TOPBP1     | sp Q92547     | 0.2                           | 0.1               | 72.3               | 1172.8             | 8.4                         | 13.1                        | 48                   |
| P35527;CON_P3552    | Keratin, type I cytoskeletal 9                          | KRT9       | sp P35527     | 1900.9                        | 5294.7            | 4583.4             | 2967.6             | 1.3                         | -0.35                       | 42                   |
| P04264;CON_P0426    | Keratin, type II cytoskeletal 1                         | KRT1       | sp P04264     | 3055.0                        | 13788.1           | 11573.7            | 5399.7             | 1.9                         | -1.4                        | 41                   |
| P15924;P15924-3;P1  | Desmoplakin                                             | DSP        | sp P15924     | 1.8                           | 55.7              | 36.7               | 13.9               | 4.3                         | -2.0                        | 39                   |
| Q96RQ3;E9PHF7;F5G1  | Methylcrotonoyl-CoA carboxylase subunit alpha, mitr     | MCCC1      | sp Q96RQ3     | 274.9                         | 44.0              | 42.5               | 134.0              | -2.7                        | 1.6                         | 23                   |
| O00763;O00763-3;O0  | Acetyl-CoA carboxylase 2;Biotin carboxylase             | ACACB      | sp O00763     | 19.7                          | 3.1               | 2.8                | 12.1               | -2.8                        | 2.0                         | 19                   |
| Q00839-2;Q00839;Q5  | Heterogeneous nuclear ribonucleoprotein U               | HNRNPU     | sp Q00839     | 124.1                         | 11.8              | 29.9               | 135.6              | -2.1                        | 3.5                         | 17                   |
| Q02413;Q02413-2     | Desmoglein-1                                            | DSG1       | sp Q02413     | 1.8                           | 39.9              | 30.7               | 8.4                | 4.1                         | -2.3                        | 17                   |
| P12883;P13533;P128  | Myosin-6                                                | MYH7;MYH   | sp P12883     | 26.9                          | 1.2               | 0.9                | 24.6               | -4.9                        | 4.3                         | 16                   |
| P11498;E9P568;P114  | Pyruvate carboxylase, mitochondrial                     | PC         | sp P11498     | 21.2                          | 3.5               | 2.8                | 11.5               | -2.9                        | 1.7                         | 15                   |
| A0A0C4DG89;Q7L014   | Probable ATP-dependent RNA helicase DDX46               | DDX46      | tr A0A0C4     | 60.1                          | 0.0               | 2.3                | 31.8               | -4.7                        | #DIV/0!                     | 14                   |
| P14923;C9JTX4;C9J82 | Junction plakoglobin                                    | JUP        | sp P14923     | 2.3                           | 18.5              | 20.3               | 2.0                | 3.2                         | -3.2                        | 13                   |
| P04406;P04406-2;E7I | Glyceraldehyde-3-phosphate dehydrogenase                | GAPDH      | sp P04406     | 5.3                           | 2.1               | 8.5                | 5.8                | 0.7                         | 1.5                         | 11                   |
| P07355;P07355-2;H0  | Annexin A2;Annexin;Putative annexin A2-like protein     | ANXA2;AN   | sp P07355     | 1.3                           | 14.2              | 6.4                | 6.2                | 2.3                         | -1.2                        | 11                   |
| Q08188              | Protein-glutamine gamma-glutamyltransferase E;Prot      | TGM3       | sp Q08188     | 1.1                           | 5.8               | 15.7               | 3.7                | 3.9                         | -0.6                        | 10                   |
| Q5JPS3;P07437;Q5ST  | Tubulin beta chain;Tubulin beta-4B chain;Tubulin bet    | TUBB;TUBB  | tr Q5JPS3     | 20.2                          | 3.7               | 10.3               | 19.2               | -1.0                        | 2.4                         | 10                   |
| Q9HCC0;Q9HCC0-2;Df  | Methylcrotonoyl-CoA carboxylase beta chain, mitoch      | MCCC2      | sp Q9HCC0     | 21.5                          | 1.6               | 1.8                | 8.5                | -3.6                        | 2.4                         | 10                   |
| A0A0J9YU3;A0A0J9Y9  | Poly(U)-binding-splicing factor PUF60                   | PUF60      | tr A0A0J9     | 9.1                           | 2.6               | 3.1                | 12.0               | -1.6                        | 2.2                         | 9                    |
| F5H5D3;Q9BQE3;P68   | Tubulin alpha-1C chain;Tubulin alpha-1B chain;Tubul     | TUBA1C;TU  | tr F5H5D3     | 8.7                           | 8.1               | 6.3                | 10.1               | -0.5                        | 0.3                         | 9                    |
| P11142;E9PKE3;P111  | Heat shock cognate 71 kDa protein                       | HSPA8      | sp P11142     | 8.0                           | 4.0               | 5.3                | 10.7               | -0.6                        | 1.4                         | 9                    |
| P22735;P22735-2;H0  | Protein-glutamine gamma-glutamyltransferase K           | TGM1       | sp P22735     | 0.0                           | 12.8              | 4.0                | 0.0                | #DIV/0!                     | #NUM!                       | 9                    |
| P29508;P29508-2;H0  | Serpin B3;Serpin B4                                     | SERP1NB3;S | sp P29508     | 0.0                           | 2.1               | 1.9                | 0.0                | #DIV/0!                     | #NUM!                       | 9                    |
| Q13867;K7E5E8;J3K5E | Bleomycin hydrolase                                     | BLMH       | sp Q13867     | 0.3                           | 5.5               | 10.1               | 5.3                | -1.0                        | 1.9                         | 9                    |
| Q5VTE0;P68104;A0A0  | Putative elongation factor 1-alpha-like 3;Elongation fa | EEF1A1P5;I | sp Q5VTE0     | 44.4                          | 19.4              | 32.3               | 71.6               | -0.5                        | 1.9                         | 9                    |
| F6VRR5;Q9B77;F8W    | Polymerase delta-interacting protein 3                  | POLDIP3    | tr F6VRR5     | 10.3                          | 3.5               | 3.1                | 13.2               | -1.7                        | 1.9                         | 8                    |
| H0YH81;P06576;F8W   | ATP synthase subunit beta;ATP synthase subunit beta     | ATP5B      | tr H0YH81     | 0.0                           | 14.7              | 7.8                | 0.0                | #DIV/0!                     | #NUM!                       | 8                    |
| P04083;Q5T3N1;Q5T3  | Annexin A1;Annexin                                      | ANXA1      | sp P04083     | 0.0                           | 0.2               | 0.1                | 0.2                | #DIV/0!                     | 0.5                         | 8                    |
| P25311;C9JEV0;H7BZ  | Zinc-alpha-2-glycoprotein                               | AZGP1      | sp P25311     | 259.3                         | 835.1             | 1251.8             | 272.4              | 2.3                         | 1.4                         | 8                    |
| P38646;D6RUI2;H0Y8  | Stress-70 protein, mitochondrial                        | HSPA9      | sp P38646     | 12.9                          | 1.4               | 3.7                | 15.2               | -1.8                        | 3.4                         | 8                    |
| Q08554-2;Q08554     | Desmocollin-1                                           | DSC1       | sp Q08554     | 6.1                           | 61.8              | 37.8               | 18.1               | 2.6                         | -1.8                        | 8                    |
| Q86V81;E9PB61       | THO complex subunit 4                                   | ALYREF     | sp Q86V81     | 93.7                          | 26.1              | 32.5               | 79.6               | -1.5                        | 1.6                         | 8                    |
| P04040              | Catalase                                                | CAT        | sp P04040     | 0.0                           | 16.2              | 5.6                | 2.4                | #DIV/0!                     | -2.8                        | 7                    |
| P05089;P05089-2;P0  | Arginase-1                                              | ARG1       | sp P05089     | 1.9                           | 7.8               | 6.7                | 12.7               | 1.8                         | 0.7                         | 7                    |
| P31944              | Caspase-14;Caspase-14 subunit p17, mature form;Cas      | CASP14     | sp P31944     | 0.9                           | 8.1               | 2.4                | 5.0                | 1.3                         | -0.7                        | 7                    |
| Q8TA86;C9J6V2       | Retinitis pigmentosa 9 protein                          | RP9        | sp Q8TA86     | 24.8                          | 0.5               | 0.0                | 8.8                | #NUM!                       | 4.2                         | 7                    |
| Q96P63;Q96P63-2     | Serpin B12                                              | SERP1NB12  | sp Q96P63     | 0.0                           | 10.6              | 11.0               | 0.0                | #DIV/0!                     | #NUM!                       | 7                    |
| H0Y4X3;Q14498-3;Q1  | RNA-binding protein 39                                  | RBM39      | tr H0Y4X3     | 14.9                          | 0.1               | 0.0                | 4.6                | #NUM!                       | 5.4                         | 6                    |
| P01040;C9J0E4       | Cystatin-A;Cystatin-A, N-terminally processed           | CSTA       | sp P01040     | 6.0                           | 8.2               | 8.4                | 12.9               | 0.5                         | 0.7                         | 6                    |
| P02452              | Collagen alpha-1(I) chain                               | COL1A1     | sp P02452     | 11.8                          | 0.4               | 247.9              | 0.2                | 4.4                         | -1.2                        | 6                    |
| P06702              | Protein S100-A9                                         | S100A9     | sp P06702     | 0.0                           | 18.1              | 16.5               | 5.6                | #DIV/0!                     | -1.7                        | 6                    |
| P06733;P06733-2;K7I | Alpha-enolase;Enolase                                   | ENO1       | sp P06733     | 1.7                           | 7.9               | 1.8                | 0.0                | 0.1                         | #NUM!                       | 6                    |
| P25705-3;P25705;K7I | ATP synthase subunit alpha, mitochondrial               | ATP5A1     | sp P25705     | 0.0                           | 6.4               | 4.4                | 0.0                | #DIV/0!                     | 0.0                         | 6                    |
| A0A087WTA8;P08123   | Collagen alpha-2(I) chain                               | COL1A2     | tr A0A087     | 0.0                           | 0.1               | 269.8              | 0.0                | #DIV/0!                     | -2.0                        | 5                    |
| A0A0C4DGB6;CON_P    | Serum albumin                                           | ALB        | tr A0A0C4     | 0.8                           | 1.7               | 0.5                | 1.2                | -0.8                        | -0.5                        | 5                    |
| H0Y449;P67809;C9J5  | Nuclease-sensitive element-binding protein 1            | YBX1       | tr H0Y449     | 3.7                           | 1.0               | 1.3                | 5.2                | -1.5                        | 2.4                         | 5                    |
| J3KPP4;Q95232;D6RC  | Luc7-like protein 3                                     | LUC7L3     | tr J3KPP4     | 12.8                          | 0.0               | 0.0                | 9.8                | #NUM!                       | #DIV/0!                     | 5                    |
| K7ENG2;P26368-2;P2  | Splicing factor U2AF 65 kDa subunit                     | U2AF2      | tr K7ENG2     | 6.0                           | 0.4               | 0.3                | 10.8               | -4.2                        | 1.7                         | 5                    |
| P04745;Q5T085;P199  | Alpha-amylase 1;Alpha-amylase;Alpha-amylase 2B;Par      | AMY1A;AM   | sp P04745     | 0.0                           | 0.1               | 0.0                | 0.3                | #DIV/0!                     | 4.5                         | 5                    |
| P06732              | Creatine kinase M-type;Creatine kinase M-type, N-term   | CKM        | sp P06732     | 3.0                           | 3.1               | 0.0                | 18.1               | #NUM!                       | 2.6                         | 5                    |
| P22626-2;P22626;A0  | Heterogeneous nuclear ribonucleoproteins A2/B1          | HNRNP2A8   | sp P22626     | 2.0                           | 0.8               | 0.6                | 0.0                | -1.8                        | #NUM!                       | 5                    |
| P26196;Q8I9V6       | Probable ATP-dependent RNA helicase DDX6                | DDX6       | sp P26196     | 7.3                           | 0.0               | 0.0                | 4.5                | #NUM!                       | #DIV/0!                     | 5                    |
| P42357-2;P42357;P4  | Histidine ammonia-lyase                                 | HAL        | sp P42357     | 0.0                           | 7.6               | 4.8                | 1.0                | #DIV/0!                     | -2.9                        | 5                    |
| P53999;D6RC37;D6R   | Activated RNA polymerase II transcriptional coactivat   | SUB1       | sp P53999     | 6.1                           | 2.4               | 4.1                | 6.5                | -0.6                        | 1.5                         | 5                    |
| Q6UWP8;K7ESC4;Q6U   | Suprabasin                                              | SBSN       | sp Q6UWP8     | 1.4                           | 7.2               | 7.9                | 6.9                | 2.5                         | -0.1                        | 5                    |
| Q96E15;Q96E15-2;A2R | Transcription elongation factor A protein-like 4        | TCEAL4     | sp Q96E15     | 5.5                           | 2.5               | 1.5                | 6.1                | -1.9                        | 1.3                         | 5                    |
| E7ET15;O15042-2;O1  | U2 snRNP-associated SURP motif-containing protein       | U2SURP     | tr E7ET15     | 6.0                           | 0.7               | 0.0                | 7.1                | #NUM!                       | 3.3                         | 4                    |
| H3BP58;H3BQN4;J3KF  | Fructose-bisphosphate aldolase;Fructose-bisphosphat     | ALDOA      | tr H3BP58     | 1.1                           | 1.3               | 1.1                | 2.3                | -0.1                        | 0.8                         | 4                    |
| H7C469;A0A1B0GW4    | Cathepsin D;Cathepsin D light chain;Cathepsin D heav    | CTSD       | tr H7C469     | 0.0                           | 1.3               | 1.7                | 1.5                | #DIV/0!                     | 0.2                         | 4                    |
| O43809;H3BV41;H3B1  | Cleavage and polyadenylation specificity factor subun   | NUDT21     | sp O43809     | 1.9                           | 2.3               | 0.0                | 3.9                | #NUM!                       | 0.7                         | 4                    |
| P08238;P07900;P079  | Heat shock protein HSP 90-beta;Heat shock protein H:    | HSP90A81;S | sp P08238     | 0.0                           | 1.9               | 3.0                | 0.0                | #DIV/0!                     | #NUM!                       | 4                    |
| P10599;P10599-2     | Thioredoxin                                             | TXN        | sp P10599     | 0.6                           | 2.5               | 2.5                | 0.8                | 2.1                         | -1.7                        | 4                    |
| P10809;C9J125;E7EXE | 60 kDa heat shock protein, mitochondrial                | HSPD1      | sp P10809     | 0.5                           | 0.7               | 1.0                | 0.4                | 0.9                         | -0.8                        | 4                    |
| P62314;J3QLJ9;J3QLR | Small nuclear ribonucleoprotein Sm D1                   | SNRPD1     | sp P62314     | 3.9                           | 1.2               | 1.7                | 5.1                | -1.2                        | 2.1                         | 4                    |
| Q9Y383;Q96HJ9-2;A0  | Putative RNA-binding protein Luc7-like 2                | LUC7L2     | sp Q9Y383     | 29.7                          | 0.2               | 0.7                | 45.6               | -5.5                        | 7.5                         | 4                    |
| A0A0C4DGN4;Q96DA    | Zymogen granule protein 16 homolog B                    | ZG16B      | tr A0A0C4     | 0.0                           | 0.7               | 1.0                | 1.1                | #DIV/0!                     | 0.7                         | 3                    |
| A0A0U1RR32;A0A0U1   | Histone H2A type 1-J;Histone H2A type 1-H;Histone H:    | HIST1H2AJ  | tr A0A0U1     | 1.3                           | 1.3               | 1.5                | 3.1                | 0.2                         | 1.3                         | 3                    |
| B8Z2Q6;P06454-2;P06 | Prothymosin alpha;Prothymosin alpha, N-terminally p     | PTMA       | tr B8Z2Q6     | 0.0                           | 1.0               | 0.0                | 0.0                | #DIV/0!                     | #NUM!                       | 3                    |
| F5GYV5;H7BZV4;A0A0  | ADP-ribosylation factor-like protein 6-interacting pro  | ARL6IP4    | tr F5GYV5     | 5.6                           | 0.0               | 0.0                | 6.6                | #NUM!                       | #DIV/0!                     | 3                    |
| F8WE65;C9I557;P629  | Peptidyl-prolyl cis-trans isomerase;Peptidyl-prolyl cis | PPIA       | tr F8WE65     | 5.0                           | 0.4               | 2.7                | 0.0                | -0.9                        | 0.6                         | 3                    |
| H3BP7;P35637-2;P3   | RNA-binding protein FUS;TATA-binding protein-associ     | FUS;TAF15  | tr H3BP7      | 2.5                           | 1.5               | 1.3                | 1.4                | -1.0                        | -0.1                        | 3                    |
| H3BNT5;P14618-2;P1  | Pyruvate kinase;Pyruvate kinase PKM                     | PKM        | tr H3BNT5     | 1.0                           | 1.9               | 1.1                | 1.2                | 0.1                         | -0.6                        | 3                    |
| J3KR62;Q96QA5       | Gasdermin-A                                             | GSDMA      | tr J3KR62     | 0.0                           | 3.5               | 1.8                | 0.0                | #DIV/0!                     | #NUM!                       | 3                    |
| J3QS39;J3QTR3;F5H6  | Ubiquitin-60S ribosomal protein L40;Ubiquitin;60S r     | UBB;RPS27  | tr J3QS39     | 2.0                           | 11.7              | 8.5                | 4.3                | 2.1                         | -1.4                        | 3                    |
| O75533;H7C341       | Splicing factor 3B subunit 1                            | SF3B1      | sp O75533     | 1.4                           | 0.1               | 0.0                | 1.1                | #NUM!                       | 3.0                         | 3                    |
| P00338;P00338-3;F5  | L-lactate dehydrogenase A chain                         | LDHA       | sp P00338     | 0.0                           | 0.3               | 0.7                | 0.0                | #DIV/0!                     | #NUM!                       | 3                    |
| P01275              | Glucagon;Glucicent;Glucicent-related polypeptide;Ox     | GCG        | sp P01275     | 0.0                           | 1.2               | 1.2                | 0.0                | #DIV/0!                     | #NUM!                       | 3                    |
| P04792;F8WE04;C9J3  | Heat shock protein beta-1                               | HSPB1      | sp P04792     | 0.7                           | 0.5               | 0.5                | 0.7                | -0.4                        | 0.4                         | 3                    |
| P09874              | Poly(ADP-ribose) polymerase 1                           | PARP1      | sp P09874     | 1.0                           | 0.0               | 1.1                | 0.0                | 0.0                         | #DIV/0!                     | 3                    |
| PODN76;Q01081;Q01   | Splicing factor U2AF 35 kDa subunit                     | U2AF1      | sp PODN76     | 10.0                          | 0.0               | 4.5                | 5.3                | -1.1                        | #DIV/0!                     | 3                    |
| P60174-4;P60174-1;P | Triosephosphate isomerase                               | TP1        | sp P60174     | 0.0                           | 0.3               | 0.4                | 0.0                | #DIV/0!                     | #NUM!                       | 3                    |
| P63173;J3KT73;J3QLC | 60S ribosomal protein L38                               | RPL38      | sp P63173     | 8.2                           | 2.5               | 1.8                | 4.6                | -2.2                        | 0.9                         | 3                    |
| P81605;P81605-2     | Dermcidin;Survival-promoting peptide;DCD-1              | DCD        | sp P81605     | 13.2                          | 26.2              | 35.5               | 9.0                | 1.4                         | -1.6                        | 3                    |
| Q13835-2;Q13835     | Plakophilin-1                                           | PKP1       | sp Q13835     | 0.0                           | 4.1               | 0.0                | 0.0                | #DIV/0!                     | #NUM!                       | 3                    |
| Q15365;F8V720;F8WC  | Poly(rC)-binding protein 1                              | PCBP1      | sp Q15365     | 2.4                           | 0.4               | 0.4                | 3.5                | -2.5                        | 3.2                         | 3                    |
| Q8WVV4;Q8WVV4-1;C   | Protein POF1B                                           | POF1B      | sp Q8WVV4     | 0.4                           | 1.8               | 2.0                | 0.3                | 2.3                         | -2.7                        | 3                    |
| Q9HCY8              | Protein S100-A14                                        | S100A14    | sp Q9HCY8     | 0.0                           | 1.2               | 0.0                | 0.0                | #DIV/0!                     | #NUM!                       | 3                    |
| Q9Y646;E5R835;E5R   | Carboxypeptidase Q                                      | CPQ        | sp Q9Y646     | 14.8                          | 0.0               | 0.0                | 12.3               | #NUM!                       | #DIV/0!                     | 3                    |
| A0A0A0MRM9;Q1497    | Nucleolar and coiled-body phosphoprotein 1              | NOLC1      | tr A0A0A0     | 7.2                           | 0.5               | 0.7                | 7.0                | -3.4                        | 3.8                         | 2                    |
| A0A0D95FD2;Q8N1K5   | Protein THEMIS                                          | THEMIS     | tr A0A0D9     | 0.0                           | 13.6              | 0.3                | 0.0                | #DIV/0!                     | #NUM!                       | 2                    |
| A0A0G2J1W1;P0DMV    | Heat shock 70 kDa protein 1A;Heat shock 70 kDa prot     | HSPA1A;HS  | tr A0A0G2     | 2.2                           | 0.0               | 1.4                | 2.6                | -0.7                        | #DIV/0!                     | 2                    |
| A8MYV2;Q9N029-2;Q9  | Putative RNA-binding protein Luc7-like 1                | LUC7L1     | tr A8MYV2     | 0.7                           | 0.0               | 0.0                | 0.0                | #NUM!                       | #DIV/0!                     | 2                    |
| C9J4Z3;P61513;G5E91 | 60S ribosomal protein L37a                              | RPL37A     | tr C9J4Z3     | 0.2                           | 0.2               | 0.0                | 0.5                | #NUM!                       | 1.2                         | 2                    |
| E7EQG2;P60842;Q142  | Eukaryotic initiation factor 4A-I;Eukaryotic initiation | EIF4A2;EIF |               |                               |                   |                    |                    |                             |                             |                      |

|                     |                                                                           |            |            |        |        |         |        |         |         |   |
|---------------------|---------------------------------------------------------------------------|------------|------------|--------|--------|---------|--------|---------|---------|---|
| E7EX29;P63104;E5RG  | 14-3-3 protein zeta/delta;14-3-3 protein sigma;14-3-3 YWHA2;YW tr E7EX29  | 0.0        | 0.7        | 0.6    | 0.5    | #DIV/0! | -0.5   | 2       |         |   |
| E9PRD9;E9PQ75;E9PL  | Vascular non-inflammatory molecule 2                                      | VNN2       | tr E9PRD9  | 6.7    | 0.0    | 0.4     | 6.2    | -4.1    | #DIV/0! | 2 |
| F8VW21;P05388;F8W   | 60S acidic ribosomal protein P0;60S acidic ribosomal RPLP0;RPL1 tr F8VW21 | 0.0        | 0.4        | 0.3    | 0.0    | 0.0     | 0.0    | #DIV/0! | #NUM!   | 2 |
| F8W6P5;P68871;A0A1  | Hemoglobin subunit beta;LVV-hemorphin-7;Spinorpl HBB;HBD tr F8W6P5        | 2.9        | 1.6        | 1.0    | 1.7    | 1.7     | -1.5   | 0.1     | 2       | 2 |
| F8WJN3;Q16630-3;Q1  | Cleavage and polyadenylation specificity factor subun CP5F6 tr F8WJN3     | 3.7        | 0.0        | 0.0    | 0.0    | 0.0     | 0.0    | #NUM!   | #DIV/0! | 2 |
| HOYH80;F8W6I7;P096  | Heterogeneous nuclear ribonucleoprotein A1;Hetero; HNRNP1 tr HOYH80       | 2.9        | 1.8        | 2.1    | 3.3    | 2.0     | -0.5   | 0.9     | 2       | 2 |
| J3KQ96;E7EY2;Q134   | Treacle protein                                                           | TCOF1      | tr J3KQ96  | 0.7    | 0.0    | 0.0     | 1.1    | #NUM!   | #DIV/0! | 2 |
| J3QLE5;P14678-2;P63 | Small nuclear ribonucleoprotein-associated proteins  SNRPN;SNRP tr J3QLE5 | 0.8        | 0.0        | 0.3    | 0.7    | 0.7     | -1.3   | #DIV/0! | 2       | 2 |
| J3QTJ6;Q5CZC0-2;Q5C | Fibrous sheath-interacting protein 2                                      | FSIP2      | tr J3QTJ6  | 0.0    | 1.4    | 0.0     | 0.0    | 0.0     | #NUM!   | 2 |
| K7EK07;P84243;K7E   | V Histone H3;Histone H3.3;Histone H3.2 H3F3B;H3F tr K7EK07                | 1.0        | 0.0        | 0.0    | 1.2    | 0.0     | -0.1   | -0.1    | #DIV/0! | 2 |
| M0R0Y6;M0QYQ7;M0I   | Heterogeneous nuclear ribonucleoprotein M                                 | HNRNPM     | tr M0R0Y6  | 0.0    | 0.1    | 0.2     | 0.1    | 0.1     | #DIV/0! | 2 |
| O43143              | Pre-mRNA-splicing factor ATP-dependent RNA helicase DHX15                 | sp O43143  | 0.4        | 0.0    | 0.3    | 0.3     | -0.4   | #DIV/0! | 2       | 2 |
| P05109              | Protein S100-A8;Protein S100-A8, N-terminally proce S100A8                | sp P05109  | 0.0        | 4.5    | 3.6    | 2.2     | 2.2    | #DIV/0! | -1.0    | 2 |
| P05141;Q9HOC2       | ADP/ATP translocase 2;ADP/ATP translocase 2, N-term SLC25A5               | sp P05141  | 0.0        | 1.3    | 2.2    | 0.0     | 0.0    | #DIV/0! | #NUM!   | 2 |
| P06748-3;P06748-2;P | Nucleophosmin                                                             | NPM1       | sp P06748  | 0.7    | 0.7    | 0.6     | 0.0    | -0.1    | #NUM!   | 2 |
| P11021              | 78 kDa glucose-regulated protein                                          | HSPA5      | sp P11021  | 0.0    | 0.5    | 0.6     | 0.4    | #DIV/0! | -0.3    | 2 |
| P11387              | DNA topoisomerase 1                                                       | TOP1       | sp P11387  | 12.2   | 0.0    | 0.0     | 6.8    | #NUM!   | #DIV/0! | 2 |
| P12273              | Pro lactin-inducible protein                                              | PIP        | sp P12273  | 0.0    | 5.7    | 3.1     | 2.0    | #DIV/0! | -1.5    | 2 |
| P17900;HOYB73;E5R   | Ganglioside GM2 activator;Ganglioside GM2 activato; GM2A                  | sp P17900  | 0.0        | 0.8    | 0.0    | 0.0     | 0.0    | #DIV/0! | #NUM!   | 2 |
| P21796;C9JH7        | Voltage-dependent anion-selective channel protein 1                       | VDAC1      | sp P21796  | 0.0    | 0.7    | 0.0     | 0.0    | #DIV/0! | #NUM!   | 2 |
| P32119;A6NIW5;A0A1  | Peroxioredoxin-2                                                          | PRDX2      | sp P32119  | 0.9    | 12.0   | 6.9     | 1.5    | 3.0     | -3.0    | 2 |
| P40938-2;P40938;A0  | Replication factor C subunit 3                                            | RFC3       | sp P40938  | 0.5    | 0.3    | 0.0     | 0.3    | #NUM!   | 0.0     | 2 |
| P47929              | Galectin-7                                                                | LGALS7     | sp P47929  | 0.0    | 1.6    | 0.5     | 0.0    | #DIV/0! | -2.3    | 2 |
| P84090;G3V279       | Enhancer of rudimentary homolog                                           | ERH        | sp P84090  | 0.6    | 0.0    | 0.7     | 1.1    | 0.0     | #DIV/0! | 2 |
| Q15459              | Splicing factor 3A subunit 1                                              | SF3A1      | sp Q15459  | 0.7    | 0.0    | 0.5     | 0.8    | -0.6    | #DIV/0! | 2 |
| Q2L6G8;G8JLQ2;Q155  | Corneodesmosin                                                            | CDSN       | tr Q2L6G8  | 0.0    | 5.8    | 2.2     | 0.0    | #DIV/0! | #NUM!   | 2 |
| Q2M2H8;A0A0J9YX77   | Probable maltase-glucoamylase-like protein LOC9343                        | MGAM       | sp Q2M2H8  | 6.4    | 0.0    | 0.0     | 2.8    | #NUM!   | #DIV/0! | 2 |
| Q5BK9Y;G3XAI9;HOYH  | Protein FAM133B;Protein FAM133A                                           | FAM133B;F  | sp Q5BK9Y  | 5.0    | 0.0    | 0.0     | 3.5    | #NUM!   | #DIV/0! | 2 |
| Q7L4I2-2;Q7L4I2     | Arginine/serine-rich coiled-coil protein 2                                | RSRC2      | sp Q7L4I2- | 6.1    | 0.0    | 0.0     | 1.8    | #NUM!   | #DIV/0! | 2 |
| Q8ND56-3;Q8ND56-2   | Protein LSM14 homolog A                                                   | LSM14A     | sp Q8ND56- | 83.1   | 12.5   | 13.6    | 25.2   | -2.6    | 1.0     | 2 |
| Q8WVK2;B8ZZ98       | U4/U6.U5 small nuclear ribonucleoprotein 27 kDa pr                        | SNRNP27    | sp Q8WVK   | 7.1    | 0.0    | 0.0     | 6.6    | #NUM!   | #DIV/0! | 2 |
| Q96FQ6              | Protein S100-A16                                                          | S100A16    | sp Q96FQ6  | 0.0    | 2.3    | 0.9     | 0.0    | #DIV/0! | #NUM!   | 2 |
| Q9NWB6-3;Q9NWB6-    | Arginine and glutamate-rich protein 1                                     | ARGLU1     | sp Q9NWB6  | 16.9   | 0.0    | 1.0     | 7.6    | -4.0    | #DIV/0! | 2 |
| Q9NY12-2;Q9NY12     | H/ACA ribonucleoprotein complex subunit 1                                 | GAR1       | sp Q9NY12  | 18.9   | 2.4    | 3.0     | 18.9   | -2.6    | 3.0     | 2 |
| Q9NZT1              | Calmodulin-like protein 5                                                 | CALML5     | sp Q9NZT1  | 0.0    | 1.9    | 3.5     | 0.0    | #DIV/0! | #NUM!   | 2 |
| U3KQK0;Q99880;Q99   | Histone H2B;Histone H2B type 1-L;Histone H2B type 1                       | HIST1H2BN  | tr U3KQK0  | 0.0    | 1.1    | 0.0     | 0.9    | #DIV/0! | -0.3    | 2 |
| A0A075B6H6;P01834   | Ig kappa chain C region                                                   | IGKC       | tr A0A075  | 0.0    | 1.1    | 0.0     | 0.0    | #DIV/0! | #NUM!   | 1 |
| A0A087WWS6          |                                                                           | IFNA13     | tr A0A087  | 6.8    | 0.0    | 0.0     | 0.0    | #NUM!   | #DIV/0! | 1 |
| A0A087WVY3;P3041    | NK-tumor recognition protein;Putative peptidyl-proh                       | NKTR       | tr A0A087  | 4.8    | 0.0    | 0.0     | 3.7    | #NUM!   | #DIV/0! | 1 |
| A0A087X106;CON_O    | Keratin, type II cuticular Hb6;Keratin, type II cuticular                 | KRT81;KRT1 | tr A0A087  | 0.0    | 0.3    | 0.4     | 0.0    | #DIV/0! | #NUM!   | 1 |
| A0A0A0MSI0;Q06830   | Peroxioredoxin-1                                                          | PRDX1      | tr A0A0A0  | 0.0    | 0.4    | 0.5     | 0.0    | #DIV/0! | #NUM!   | 1 |
| A0A0G2JRN3;A0A0241  | Alpha-1-antitrypsin;Short peptide from AAT                                | SERPINA1   | tr A0A0G2  | 0.5    | 0.0    | 0.0     | 0.3    | #NUM!   | #DIV/0! | 1 |
| A1A5B4-3;A1A5B4     | Anoctamin-9                                                               | ANO9       | sp A1A5B4  | 223.4  | 0.0    | 0.0     | 187.4  | #NUM!   | #DIV/0! | 1 |
| B1AN99;P35030-5;P3  | Trypsin-3                                                                 | PRSS3      | tr B1AN99  | 46.3   | 138.8  | 8.3     | 78.7   | -2.5    | -0.8    | 1 |
| B4DYP1              |                                                                           |            | tr B4DYP1  | 0.0    | 1.1    | 0.0     | 0.0    | #DIV/0! | #NUM!   | 1 |
| B6VEX4;A0A0A0MRT6   | Abl interactor 1                                                          | ABI1       | tr B6VEX4  | 2.0    | 0.0    | 0.0     | 1.2    | #NUM!   | #DIV/0! | 1 |
| D6RB45;A0A1B0GX04   | Matrin-3                                                                  | MATR3      | tr D6RB45  | 0.0    | 0.2    | 0.0     | 0.0    | #DIV/0! | #NUM!   | 1 |
| E9PIZ2;Q8N3Y3       | Glycosyltransferase-like protein LARGE2;Xylosyltrans                      | GYLTL1B    | tr E9PIZ2  | 2.3    | 0.0    | 0.0     | 2.0    | #NUM!   | #DIV/0! | 1 |
| E9PLA6;E9PIH8;E9PI  | Serp1n H1                                                                 | SERPINH1   | tr E9PLA6  | 0.0    | 0.1    | 0.0     | 0.0    | #DIV/0! | #NUM!   | 1 |
| F8VV32;A0A0A4J259   | Lysozyme;Lysozyme C                                                       | LYZ        | tr F8VV32  | 3.5    | 5.5    | 5.2     | 10.3   | 0.6     | 0.9     | 1 |
| F8VZ99;P05783       | Keratin, type I cytoskeletal 18                                           | KRT18      | tr F8VZ99  | 0.0    | 0.6    | 0.0     | 0.0    | #DIV/0! | #NUM!   | 1 |
| G3V258              |                                                                           | ADCY4      | tr G3V258  | 7.2    | 0.0    | 0.0     | 4.0    | #NUM!   | #DIV/0! | 1 |
| HOY5C3;P32004-3;P3  | Neural cell adhesion molecule L1                                          | L1CAM      | tr HOY5C3  | 74.2   | 0.0    | 0.0     | 58.8   | #NUM!   | #DIV/0! | 1 |
| HOY8D1;A6XMV8;CON   | Putative trypsin-6;Trypsin-2;Trypsin-1;Alpha-trypsin                      | PRSS1;PRSS | tr HOY8D1  | 147.3  | 49.8   | 15.9    | 79.5   | -3.2    | 0.7     | 1 |
| HOYMP2;HOYL71;H3B   | Mothers against decapentaplegic homolog                                   | SMAD3      | tr HOYMP2  | 4.2    | 0.0    | 0.0     | 5.1    | #NUM!   | #DIV/0! | 1 |
| H7C5C2;Q14188-7;Q1  | Transcription factor Dp-2                                                 | TFDP2      | tr H7C5C2  | 0.0    | 481.3  | 51.5    | 0.0    | #DIV/0! | #NUM!   | 1 |
| I3L1B1;O43896       | Kinesin-like protein;Kinesin-like protein KIF1C                           | KIF1C      | tr I3L1B1  | 0.0    | 9.1    | 0.0     | 0.0    | #DIV/0! | #NUM!   | 1 |
| J3QL74;J3QLI2;O4382 | Zinc finger and BTB domain-containing protein 14                          | ZBTB14     | tr J3QL74  | 2657.2 | 2.0    | 1.5     | 12.9   | -10.8   | 2.3     | 1 |
| M0QZK8;O75223-3;O   | Gamma-glutamylcyclotransferase                                            | GGCT       | tr M0QZK8  | 0.3    | 1.0    | 1.1     | 0.0    | 1.7     | #NUM!   | 1 |
| O75319              | RNA/RNP complex-1-interacting phosphatase                                 | RNUP11     | sp O75319  | 1.2    | 0.0    | 0.0     | 1.2    | #NUM!   | #DIV/0! | 1 |
| O75343              | Guanylate cyclase soluble subunit beta-2                                  | GUICY1B2   | sp O75343  | 27.1   | 0.0    | 0.0     | 19.2   | #NUM!   | #DIV/0! | 1 |
| O75400-2;O75400-3   | Pre-mRNA-processing factor 40 homolog A                                   | PRPF40A    | sp O75400- | 1.3    | 0.0    | 0.0     | 4.0    | #NUM!   | #DIV/0! | 1 |
| O75874              | Isocitrate dehydrogenase [NADP] cytoplasmic                               | IDH1       | sp O75874  | 0.0    | 1.5    | 0.0     | 0.0    | #DIV/0! | #NUM!   | 1 |
| O75901              | Ras association domain-containing protein 9                               | RASSF9     | sp O75901  | 2.8    | 0.0    | 0.0     | 2.9    | #NUM!   | #DIV/0! | 1 |
| O95497              | Pantetheinase                                                             | VNN1       | sp O95497  | 2.3    | 0.0    | 0.0     | 2.7    | #NUM!   | #DIV/0! | 1 |
| P04259              | Keratin, type II cytoskeletal 6B                                          | KRT6B      | sp P04259  | 6.7    | 108.3  | 30.0    | 31.8   | 2.2     | -1.8    | 1 |
| P07858              | Cathepsin B;Cathepsin B light chain;Cathepsin B heav                      | CTSB       | sp P07858  | 0.0    | 0.8    | 0.0     | 0.0    | #DIV/0! | #NUM!   | 1 |
| P09210;P08263       | Glutathione S-transferase A2;Glutathione S-transferas                     | GSTA2;GST  | sp P09210  | 0.1    | 0.0    | 0.1     | 0.5    | -0.4    | #DIV/0! | 1 |
| P17066;P48741       | Heat shock 70 kDa protein 6;Putative heat shock 70 kI                     | HSPA6;HSP  | sp P17066  | 3.0    | 4.0    | 3.4     | 2.3    | 0.2     | -0.8    | 1 |
| P26006;P26006-1     | Integrin alpha-3;Integrin alpha-3 heavy chain;Integrin                    | ITGA3      | sp P26006  | 0.0    | 425.8  | 61.6    | 0.0    | #DIV/0! | #NUM!   | 1 |
| P30050-2;P30050     | 60S ribosomal protein L12                                                 | RPL12      | sp P30050- | 0.0    | 0.7    | 0.3     | 0.0    | #DIV/0! | #NUM!   | 1 |
| P35908              | Keratin, type II cytoskeletal 2 epidermal                                 | KRT2       | sp P35908  | 855.5  | 6100.3 | 5414.0  | 2338.3 | 2.7     | -1.4    | 1 |
| P42081              | T-lymphocyte activation antigen CD86                                      | CD86       | sp P42081  | 0.0    | 3.6    | 0.0     | 0.0    | #DIV/0! | #NUM!   | 1 |
| P52597              | Heterogeneous nuclear ribonucleoprotein F;Heteroge                        | HNRNPF     | sp P52597  | 0.8    | 0.0    | 0.0     | 0.7    | #NUM!   | #DIV/0! | 1 |
| P53396-3;P53396-2   | P ATP-citrate synthase                                                    | ACLY       | sp P53396- | 0.0    | 0.2    | 0.0     | 0.1    | #DIV/0! | -1.4    | 1 |
| P60709;E5E9R0;E7E   | Actin, cytoplasmic 1;Actin, cytoplasmic 1, N-terminal                     | ACTB       | sp P60709  | 17.2   | 10.0   | 8.8     | 5.8    | -1.0    | -0.8    | 1 |
| P62306              | Small nuclear ribonucleoprotein F                                         | SNRPF      | sp P62306  | 1.0    | 0.5    | 0.0     | 0.0    | #NUM!   | #NUM!   | 1 |
| P62805              | Histone H4                                                                | HIST1H4A   | sp P62805  | 0.3    | 0.8    | 1.0     | 0.2    | 1.8     | -1.7    | 1 |
| P63261;I3L130;I3L1  | Actin, cytoplasmic 2;Actin, cytoplasmic 2, N-terminal                     | ACTG1      | sp P63261  | 0.0    | 0.4    | 0.6     | 0.0    | #DIV/0! | #NUM!   | 1 |
| Q16584-2;Q16584     | Mitogen-activated protein kinase kinase kinase 11                         | MAP3K11    | sp Q16584- | 4.7    | 2.8    | 3.0     | 0.0    | -0.7    | #NUM!   | 1 |
| Q3B726              | DNA-directed RNA polymerase I subunit RPA43                               | TWISTNB    | sp Q3B726  | 0.8    | 0.0    | 0.0     | 0.9    | #NUM!   | #DIV/0! | 1 |
| Q562R1              | Beta-actin-like protein 2                                                 | ACTBL2     | sp Q562R1  | 0.0    | 3.6    | 4.2     | 0.0    | #DIV/0! | #NUM!   | 1 |
| Q6NXT1-2            |                                                                           |            | sp Q6NXT1- | 0.0    | 0.9    | 3.5     | 0.0    | #DIV/0! | #NUM!   | 1 |
| Q86X95-2;Q86X95     | Corepressor interacting with RBP1                                         | CIR1       | sp Q86X95- | 0.6    | 0.0    | 0.2     | 0.8    | -1.4    | #DIV/0! | 1 |
| Q86Y37-2;Q86Y37     | CDK2-associated and cullin domain-containing protei                       | CACUL1     | sp Q86Y37- | 25.3   | 0.0    | 0.0     | 16.5   | #NUM!   | #DIV/0! | 1 |
| Q96AE7-2;Q96AE7     | Tetratricopeptide repeat protein 17                                       | TTC17      | sp Q96AE7- | 1.1    | 3428.6 | 0.0     | 1.2    | #NUM!   | -11.5   | 1 |
| Q96NLO-2            |                                                                           |            | sp Q96NLO- | 23.8   | 0.0    | 0.0     | 49.5   | #NUM!   | #DIV/0! | 1 |
| Q96PE3-2;Q96PE3-4   | C Type I inositol 3,4-bisphosphate 4-phosphatase                          | INPP4A     | sp Q96PE3- | 67.0   | 0.0    | 0.0     | 21.7   | #NUM!   | #DIV/0! | 1 |
| Q96RE9-3            |                                                                           |            | sp Q96RE9- | 0.0    | 7.3    | 85.5    | 0.0    | #DIV/0! | #NUM!   | 1 |
| Q9NP86              | Calcium-binding protein 5                                                 | CABP5      | sp Q9NP86  | 40.2   | 0.0    | 0.0     | 1.8    | #NUM!   | #DIV/0! | 1 |
| Q9UKX2              | Myosin-2                                                                  | MYH2       | sp Q9UKX2  | 0.1    | 0.0    | 0.0     | 0.3    | #NUM!   | #DIV/0! | 1 |
| Q9UQG0              | Endogenous retrovirus group K member 11 Pol protei                        | ERVK-11    | sp Q9UQG0  | 3.3    | 0.6    | 0.0     | 0.0    | #NUM!   | #NUM!   | 1 |
| Q9Y371-3            |                                                                           |            | sp Q9Y371- | 292.4  | 0.0    | 0.0     | 0.0    | #NUM!   | #DIV/0! | 1 |
| X6RJP6;P37802;P378  | Transgelin-2                                                              | TAGLN2     | tr X6RJP6  | 0.0    | 0.8    | 0.7     | 0.0    | #DIV/0! | #NUM!   | 1 |
